# Supplementary material for: pVACview: an interactive visualization tool for efficient neoantigen prioritization and selection
Source: PubMed Central journal article supplement (PMC11562694; doi:10.1186/s13073-024-01384-7), 2024-11-14

|                         | Tool/Package Name                                                                       | pVACtools | NeoFox | Vaxrank                                                                                | Antigen.garnish                                                         | NeoPredPipe        |
|-------------------------|-----------------------------------------------------------------------------------------|-----------|--------|----------------------------------------------------------------------------------------|-------------------------------------------------------------------------|--------------------|
| Variant Level Inputs    | Genomic Coordinates                                                                     |           |        |                                                                                        |                                                                         |                    |
|                         | Mutation Position                                                                       |           |        |                                                                                        |                                                                         |                    |
|                         | Gene Name                                                                               |           |        |                                                                                        |                                                                         |                    |
|                         | Amino Acid Change                                                                       |           |        |                                                                                        |                                                                         |                    |
|                         | DNA Depth                                                                               |           |        |                                                                                        |                                                                         |                    |
|                         | DNA VAF                                                                                 |           |        |                                                                                        |                                                                         |                    |
|                         | Gene Expression                                                                         |           |        |                                                                                        |                                                                         |                    |
|                         | RNA VAF                                                                                 |           |        | Provides "Variant allele RNA read count"                                               |                                                                         |                    |
|                         | RNA Depth                                                                               |           |        |                                                                                        |                                                                         |                    |
| Transcript Level Inputs | Transcript Expression                                                                   |           |        |                                                                                        |                                                                         |                    |
|                         | Transcript Support Level                                                                |           |        |                                                                                        |                                                                         |                    |
|                         | Biotype                                                                                 |           |        |                                                                                        |                                                                         |                    |
|                         | Length                                                                                  |           |        |                                                                                        |                                                                         |                    |
|                         | Location of variant in transcript                                                       |           |        |                                                                                        |                                                                         |                    |
| Peptide Level Inputs    | Minimum Peptide Sequence and matched HLA                                                |           |        |                                                                                        |                                                                         |                    |
|                         | Peptide sequences (from different registers of same variant)                            |           |        |                                                                                        |                                                                         |                    |
|                         | Peptides from different transcripts                                                     |           |        |                                                                                        | The tool will only predict peptides derived from user-input transcript. |                    |
|                         | Predicted Binding Affinities                                                            |           |        |                                                                                        |                                                                         |                    |
|                         | Multiple prediction algorithms                                                          |           |        | User needs to compile from multiple output files (each corresponding to one algorithm) |                                                                         |                    |
|                         | Class I and Class II prediction algorithms                                              |           |        |                                                                                        |                                                                         |                    |
|                         | Multiple binding measurements (e.g. IC50, percentile) available                         |           |        |                                                                                        |                                                                         |                    |
|                         | Algorithms with different training data (e.g. in vitro binding, elution data)           |           |        |                                                                                        |                                                                         | Uses netMHCpan-4.1 |
|                         | Binding results for both wildtype and mutant peptides                                   |           |        |                                                                                        |                                                                         |                    |
|                         | Binding results available for multiple HLA alleles (not solely best binding HLA allele) |           |        |                                                                                        |                                                                         |                    |

Generated by tool with input data (or part of required input)

Can be added by user as annotation but can't be generated by tool

Does not exist in output file

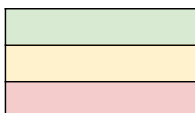

Supplement: 13073_2024_1384_MOESM2_ESM.pdf [file 13073_2024_1384_MOESM2_ESM.pdf]
