# Supplementary material for: pVACview: an interactive visualization tool for efficient neoantigen prioritization and selection
Source: PubMed Central journal article supplement (PMC11562694; doi:10.1186/s13073-024-01384-7), 2024-11-14
Supplement: 13073_2024_1384_MOESM1_ESM.pdf [file 13073_2024_1384_MOESM1_ESM.pdf]

| Tool Name                | Language                               | Has Visualization                       | Initial tool publication date                                                                                | Last Changes on Github (as of May 2024)        | Citations (as of May 2024) | Does this tool provide information for multiple peptides derived from 1 individual variant? | Binding prediction algorithms used                                                                                                                                        | Github Repo/Documentation                                                                                                                                                                                                                                                                                                                                                    | Best Docker                                                                                                                         |
|--------------------------|----------------------------------------|-----------------------------------------|--------------------------------------------------------------------------------------------------------------|------------------------------------------------|----------------------------|---------------------------------------------------------------------------------------------|---------------------------------------------------------------------------------------------------------------------------------------------------------------------------|------------------------------------------------------------------------------------------------------------------------------------------------------------------------------------------------------------------------------------------------------------------------------------------------------------------------------------------------------------------------------|-------------------------------------------------------------------------------------------------------------------------------------|
| pVACTools                | Python                                 | Yes (pVACview)                          | Jan 2016 (Updated version: March 2020)                                                                       | May 2024                                       | 406                        | Yes                                                                                         | NetMHCpan, NetMHC, NetMHCcons, PickPocket, SMM, SMMPMBEC, MHCflurry, MHCnuggets, NetMHCIIpan, SMMalign, NNalign                                                           | <a href="https://github.com/griffithlab/pVACTools">https://github.com/griffithlab/pVACTools</a>                                                                                                                                                                                                                                                                              | <a href="https://hub.docker.com/tr/griffithlab/pvactools">https://hub.docker.com/tr/griffithlab/pvactools</a>                       |
| Epi-Seq                  | Java                                   | No                                      | Oct 2014                                                                                                     | N/A (Software version available from Mar 2013) | 431                        | No                                                                                          | netMHC                                                                                                                                                                    | <a href="https://dna.engr.uconn.edu/?page_id=470#~:text=Epi%2DSeq%2Dis%20a%20multi,predicted%20umor%2Dspecific%20expressed%20epitopes.">https://dna.engr.uconn.edu/?page_id=470#~:text=Epi%2DSeq%2Dis%20a%20multi,predicted%20umor%2Dspecific%20expressed%20epitopes.</a>                                                                                                    | dockerfile not found                                                                                                                |
| MuPeXi                   | Python                                 | No                                      | Apr 2017                                                                                                     | Feb 2019                                       | 136                        | Yes                                                                                         | netMHCpan                                                                                                                                                                 | <a href="https://github.com/ambj/MuPeXi">https://github.com/ambj/MuPeXi</a>                                                                                                                                                                                                                                                                                                  | <a href="https://hub.docker.com/tr/openvax/mupexi-grch38">https://hub.docker.com/tr/openvax/mupexi-grch38</a>                       |
| Antigen.garnish          | R                                      | No                                      | October 2019                                                                                                 | July 2022                                      | 119                        | Yes                                                                                         | NetMHC, NetMHCpan, NetMHCII, NetMHCIIpan                                                                                                                                  | <a href="https://github.com/andrewrech/antigen.garnish">https://github.com/andrewrech/antigen.garnish</a>                                                                                                                                                                                                                                                                    | <a href="https://hub.docker.com/tr/andrewrech/antigen.garnish">https://hub.docker.com/tr/andrewrech/antigen.garnish</a>             |
| NeoPredPipe              | Python 2.7+                            | Yes (NeoPredViz)                        | May 2019                                                                                                     | Sep 2023                                       | 95                         | No                                                                                          | netMHCpan, netMHCpanII                                                                                                                                                    | <a href="https://github.com/MathOnco/NeoPredPipe">https://github.com/MathOnco/NeoPredPipe</a>                                                                                                                                                                                                                                                                                | <a href="https://eszerlakatos/neopredpipe">https://eszerlakatos/neopredpipe</a>                                                     |
| NeoFlow                  | Nextflow, Python, R                    | No                                      | Apr 2020                                                                                                     | July 2023                                      | 70                         | Yes                                                                                         | netMHCpan                                                                                                                                                                 | <a href="https://github.com/bzhanglab/neoflow">https://github.com/bzhanglab/neoflow</a>                                                                                                                                                                                                                                                                                      | <a href="https://hub.docker.com/tr/bzhanglab/neoflow">https://hub.docker.com/tr/bzhanglab/neoflow</a>                               |
| TSNAd                    | Python, Perl                           | No                                      | Apr 2017 (Updated version: Aug 2021)                                                                         | Aug 2021                                       | 79                         | Yes                                                                                         | DeepHLApan                                                                                                                                                                | <a href="https://github.com/juijezz/tsnad">https://github.com/juijezz/tsnad</a>                                                                                                                                                                                                                                                                                              | <a href="https://hub.docker.com/tr/biopharm/tsnad">https://hub.docker.com/tr/biopharm/tsnad</a>                                     |
| CloudNeo                 | CWL                                    | No                                      | Oct 2017                                                                                                     | Apr 2019                                       | 65                         | Yes, but user would need to extract information and summarize themselves                    | netMHC, netMHCpan                                                                                                                                                         | <a href="https://github.com/TheJacksonLaboratory/CloudNeo">https://github.com/TheJacksonLaboratory/CloudNeo</a>                                                                                                                                                                                                                                                              | dockerfile not found                                                                                                                |
| Epidisco                 | OCaml (kretrew workflows)              | No                                      | Nov 2017 (preprint dedicated to tool), Jan 2018 (Paper mentioned pipeline. Tool has no official publication) | Nov 2017                                       | 62                         | Yes, if providing raw vaxrank output                                                        | Algorithms utilized by Vaxrank                                                                                                                                            | <a href="https://github.com/hammerlab/epidisco">https://github.com/hammerlab/epidisco</a>                                                                                                                                                                                                                                                                                    | <a href="https://hub.docker.com/tr/hammerlab/epidisco-web">https://hub.docker.com/tr/hammerlab/epidisco-web</a>                     |
| Fred2                    | Python 2.7                             | No                                      | Jul 2016                                                                                                     | Mar 2020                                       | 37                         | Yes                                                                                         | SYFPEITHI, BIMAS, SVMHC, ARB, SMM, SMMPMBEC, Epidemix, Comblib Sidney 2008, PickPocket, NetMHC, NetMHCpan, HAMMER, TEPITOPEpan, NetMHCII, NetMHCIIpan, UniTope, NetCTLpan | <a href="https://github.com/FRED-2/Fred2/">https://github.com/FRED-2/Fred2/</a>                                                                                                                                                                                                                                                                                              | <a href="https://hub.docker.com/tr/fred2/optitype">https://hub.docker.com/tr/fred2/optitype</a>                                     |
| ptuneos                  | Python                                 | No                                      | Oct 2019                                                                                                     | Nov 2021                                       | 36                         | Yes                                                                                         | netMHCpan                                                                                                                                                                 | <a href="https://github.com/bm2-lab/pTuneos">https://github.com/bm2-lab/pTuneos</a>                                                                                                                                                                                                                                                                                          | <a href="https://hub.docker.com/tr/bm2lab/ptuneos">https://hub.docker.com/tr/bm2lab/ptuneos</a>                                     |
| Vaxrank/OpenVax          | Python                                 | No                                      | October 2018 (bioRxiv), Mar 2020 (publication)                                                               | Mar 2024                                       | 22                         | multiple peptides from one variant are included if passing all criteria                     | netMHC, netMHCpan, netMHCcons, MHCflurry, netMHCpanII                                                                                                                     | <a href="https://github.com/openvax/vaxrank">https://github.com/openvax/vaxrank</a>                                                                                                                                                                                                                                                                                          | <a href="https://hub.docker.com/tr/ngebremehin/vaxrank">https://hub.docker.com/tr/ngebremehin/vaxrank</a>                           |
| NeoFuse                  | Python, R, Shell                       | No                                      | Apr 2020                                                                                                     | Aug 2022                                       | 29                         | Yes                                                                                         | MHCflurry, netMHCpan                                                                                                                                                      | <a href="https://github.com/icbi-lab/NeoFuse">https://github.com/icbi-lab/NeoFuse</a><br>( <a href="https://icbi.i-med.ac.at/software/NeoFuse/NeoFuse.shtml">https://icbi.i-med.ac.at/software/NeoFuse/NeoFuse.shtml</a> )                                                                                                                                                   | <a href="https://hub.docker.com/tr/icbi/neoefuse">https://hub.docker.com/tr/icbi/neoefuse</a>                                       |
| ProTECT                  | Python                                 | No                                      | Nov 2020                                                                                                     | May 2018                                       | 16                         | No                                                                                          | IEDB tool suite (netMHCcons, SMMalign, PickPocket etc.)                                                                                                                   | <a href="https://github.com/BD2KGenomics/protect">https://github.com/BD2KGenomics/protect</a><br>( <a href="https://github.com/BD2KGenomics/protect/blob/master/MANUAL.md">https://github.com/BD2KGenomics/protect/blob/master/MANUAL.md</a> )                                                                                                                               | No docker image for overall pipeline ( <a href="https://hub.docker.com/u/aarjunrao/">https://hub.docker.com/u/aarjunrao/</a> )      |
| Neoantimon               | R                                      | No                                      | Sep 2020                                                                                                     | Sep 2023                                       | 8                          | Yes                                                                                         | netMHCpan, MHCflurry, netMHCIIpan                                                                                                                                         | <a href="https://github.com/hase62/Neoantimon">https://github.com/hase62/Neoantimon</a>                                                                                                                                                                                                                                                                                      | dockerfile not found                                                                                                                |
| NeoFox                   | Python                                 | No                                      | Nov 2021                                                                                                     | Oct 2023                                       | 10                         | No                                                                                          | netMHCpan, netMHCpanII, MixMHCpred, MixMHCpred2, Vaxrank, PRIME                                                                                                           | <a href="https://github.com/TRON-Bioinformatics/neofox">https://github.com/TRON-Bioinformatics/neofox</a>                                                                                                                                                                                                                                                                    | Need to build your personal docker with provided instructions                                                                       |
| NextNEOpi                | Nextflow, R, Python, java, singularity | Can use pVACview if updated pVACseq 3.0 | Feb 2022                                                                                                     | Sep 2013                                       | 22                         | Uses pVACTools which does provide peptide level information                                 | netMHCpan, netMHCIIpan, mhcfurry, mixMHC2pred                                                                                                                             | <a href="https://github.com/icbi-lab/nextNEOpi">https://github.com/icbi-lab/nextNEOpi</a>                                                                                                                                                                                                                                                                                    | dockerfile not found                                                                                                                |
| LENS                     | Nextflow                               | Yes (LENS Viz)                          | June 2023                                                                                                    | Sep 2022 (Gitlab, LENS Viz)                    | 9                          | Yes                                                                                         | NetMHCpan-4.1b                                                                                                                                                            | <a href="https://gitlab.com/landscape-of-effective-neoantigen-software">https://gitlab.com/landscape-of-effective-neoantigen-software</a><br>( <a href="https://gitlab.com/landscape-of-effective-neoantigen-software/nextflow/modules/tools/lens/-/wikis/home">https://gitlab.com/landscape-of-effective-neoantigen-software/nextflow/modules/tools/lens/-/wikis/home</a> ) | Need to build your personal docker with provided instructions                                                                       |
| ScanNeo                  | Python, snakemake                      | No                                      | Mar 2019 (updated version: Nov 2023)                                                                         | August 2022                                    | 39                         | Yes                                                                                         | NetMHC, NetMHCpan                                                                                                                                                         | <a href="https://github.com/ylab-hi/ScanNeo">https://github.com/ylab-hi/ScanNeo</a>                                                                                                                                                                                                                                                                                          | <a href="https://hub.docker.com/tr/yanglabinfo/scanneo2-scanexitron">https://hub.docker.com/tr/yanglabinfo/scanneo2-scanexitron</a> |
| Timiner                  | Python                                 | No                                      | Oct 2017                                                                                                     | N/A (no github)                                | 90                         | Yes                                                                                         | NetMHCpan                                                                                                                                                                 | <a href="https://icbi.i-med.ac.at/software/timiner/doc/">https://icbi.i-med.ac.at/software/timiner/doc/</a>                                                                                                                                                                                                                                                                  | <a href="https://hub.docker.com/tr/icbi/timiner">https://hub.docker.com/tr/icbi/timiner</a>                                         |
| TruNeo                   | Python, Perl, R                        | No                                      | Nov 2020                                                                                                     | Nov 2020                                       | 14                         | Yes                                                                                         | NetMHCpan                                                                                                                                                                 | <a href="https://github.com/yucebio/TruNeo">https://github.com/yucebio/TruNeo</a>                                                                                                                                                                                                                                                                                            | dockerfile not found                                                                                                                |
| ProGeo-Neo               | Python (V2.7), Perl and Java           | No                                      | Apr 2020 (updated version: Apr 2022)                                                                         | Apr 2022                                       | 22                         | Yes                                                                                         | NetMHCpan                                                                                                                                                                 | <a href="https://github.com/kbvstmd/ProGeo-neo">https://github.com/kbvstmd/ProGeo-neo</a>                                                                                                                                                                                                                                                                                    | dockerfile not found                                                                                                                |
| nfcore-epitopeprediction | Nextflow                               | No                                      | Feb 2020 (paper is for all 30+ pipelines in nfcore)                                                          | May 2024                                       | 674                        | Yes                                                                                         | syfpeithi, mhcfurry, mhcnuggets-class-1, mhcnuggets-class-2, netmhcpan, netmhcpan, netmhc, netmhciiapan                                                                   | <a href="https://github.com/nf-core/epitopeprediction?tab=readme-ov-file">https://github.com/nf-core/epitopeprediction?tab=readme-ov-file</a>                                                                                                                                                                                                                                | <a href="https://hub.docker.com/tr/nfcore/epitopeprediction">https://hub.docker.com/tr/nfcore/epitopeprediction</a>                 |
| Neoepiscopes             | Python                                 | No                                      | Feb 2020                                                                                                     | Aug 2022                                       | 25                         | Yes                                                                                         | mhcnuggets, mhcfurry, netMHCpan, netMHCIIpan                                                                                                                              | <a href="https://github.com/pdxgx/neoepiscopes">https://github.com/pdxgx/neoepiscopes</a>                                                                                                                                                                                                                                                                                    | Need to build your dockerfile                                                                                                       |
| Neopepsee                | Java                                   | No                                      | Jan 2020                                                                                                     | N/A (no github found)                          | 133                        | Yes                                                                                         | NetCTLpan, IEDB-Peptide binding to MHC class I molecules, IEDB-T cell class I pMHC immunogenicity predictor                                                               | <a href="https://sourceforge.net/p/neopepsee/wiki/Home/">https://sourceforge.net/p/neopepsee/wiki/Home/</a>                                                                                                                                                                                                                                                                  | dockerfile not found                                                                                                                |
| DeepHLApan               | Perl, Python, bash                     | No                                      | Nov 2019                                                                                                     | Jul 2022                                       | 95                         | user provides peptide level information                                                     | DeepHLApan                                                                                                                                                                | <a href="https://github.com/juijezz/deephapan">https://github.com/juijezz/deephapan</a>                                                                                                                                                                                                                                                                                      | <a href="https://hub.docker.com/tr/biopharm/deephapan">https://hub.docker.com/tr/biopharm/deephapan</a>                             |
