# Supplementary material for: pVACview: an interactive visualization tool for efficient neoantigen prioritization and selection
Source: Genome Med. 2024 Nov 14;16:132. doi: 10.1186/s13073-024-01384-7 (PMC11562694; doi:10.1186/s13073-024-01384-7)
Supplement: Supplementary file 3 — Additional file 3. pVACview main module feature overview. Screenshots and descriptions of all features in pVACview main module. [file 13073_2024_1384_MOESM3_ESM.pdf]

## Supplementary Figures

The pVACview main module is split into the following components: (1) user data upload, (2) neoantigen feature visualization and exploration, and (3) export of prioritized neoantigens and associated annotations for downstream applications. Users are provided with neoantigen features that are organized into three levels of detail: variant-level, transcript-level, and peptide-level. The following figures provide screenshots and descriptions of pVACview main module features.

### List of Supplementary Figures

**Fig. S1.** Upload input files

**Fig. S2.** Visualize and explore - Evaluate and compare variants

**Fig. S3.** Visualize and explore - Evaluate individual variant details: DNA/RNA VAF, gene expression and genomic variant coordinates

**Fig. S4.** Visualize and explore - Evaluate and compare alternative transcripts: transcript expression, transcript support level, biotype and transcript length

**Fig. S5.** Visualize and explore - Evaluate and compare peptides arising from a single variant and transcript set

**Fig. S6.** Visualize and explore - Evaluate an individual peptide: IC50 binding affinity violin plot

**Fig. S7.** Visualize and explore - Evaluate an individual peptide: percentile rank (%ile) violin plot

**Fig. S8.** Visualize and explore - Evaluate an individual peptide: IC50 binding affinity and percentile rank

**Fig. S9.** Visualize and explore - Evaluate an individual peptide: elution and immunogenicity

**Fig. S10.** Visualize and explore - Evaluate an individual peptide: anchor residue (heatmap)

**Fig. S11.** Visualize and explore - Evaluate an individual peptide: anchor residue (tables)

**Fig. S12.** Visualize and explore - Evaluate individual peptide: anchor scenarios

**Fig. S13.** Visualize and explore - Evaluate problematic features: reference proteome similarity

**Fig. S14.** Visualize and explore - Evaluate problematic features: problematic amino acids

**Fig. S15.** Visualize and explore - Capture evaluation status

**Fig. S16.** Visualize and explore - Rescuing poor candidate

**Fig. S17.** Export evaluated neoantigens

## Fig. S1. Upload input files

The pVACview main module has two required input files: <sample\_name>.all\_epitopes.aggregated.tsv and <sample\_name>.all\_epitopes.aggregated.metrics.json, both of which are output files from the pVACseq pipeline. The aggregated tsv file provides a list of neoantigen producing variants, features of each variant, the best predicted epitope, binding affinity scores and percentile ranks. The metrics json file contains additional transcript and peptide level information that is needed for certain features of the pVACview application. Users can also upload an additional all\_epitope.aggregated.tsv file, which is useful in cases where users are visualizing Class I prediction data but would like to have a general idea of the variant's Class II prediction performance or vice versa. Users also have the opportunity to upload a gene-of-interest tsv file, where each individual line consists of one gene name (e.g. cancer driver genes). If matched in the aggregate report, the gene name will be highlighted using bold font and a green box around the cell.

**pVACview**

≡

↳ pVACtools Output <

↑ Upload

📂 Visualize and Explore

📄 Export

📁 Neofox Data Visualization

📝 Custom Data Visualization

📖 Tutorials

📖 pVACview Documentation

🔗 Submit Github Issue

**Option 1: View demo data**

**Load demo data**

Please wait a couple seconds after clicking and you should be redirected to the Visualize and Explore tab.

**Option 2: Upload your own data Files**

**(Required)** Please upload the aggregate report file. Note that this will be the data displayed in the main table in the Explore tab.

**1. Neoantigen Candidate Aggregate Report (tsv required)**

Browse... No file selected

**Does this aggregate report file correspond to Class I or Class II prediction data?**

☒ Class I data (e.g. HLA-A\*02:01)

☐ Class II data (e.g. DPA1\*01:03)

**(Required)** Please upload the corresponding metrics file for the main file that you have chosen.

**2. Neoantigen Candidate Metrics file (json required)**

Browse... No file selected

**(Optional)** If you would like, you can upload an additional aggregate report file generated with either Class I or Class II results to supplement your main table. (E.g. if you uploaded Class I data as the main table, you can upload your Class II report here as supplemental data)

**3. Additional Neoantigen Candidate Aggregate Report (tsv required)**

Browse... No file selected

**Please provide a label for the additional file uploaded (e.g. Class I data or Class II data)**

**(Optional)** Additionally, you can upload a gene-of-interest list in a tsv format, where each row is a single gene name. These genes (if in your aggregate report) will be highlighted in the Gene Name column.

**4. Gene-of-interest List (tsv required)**

Browse... No file selected

**Visualize**

Variant-level information is presented in the main aggregate report table, showcasing the best neoantigen candidate for each variant as well as genomic information (e.g. gene identifier, amino acid change and position of the variant within the core binding peptide), expression level, DNA and RNA variant allele frequency (VAF), median binding prediction scores and percentiles, the total number of peptides that meet specified cutoffs, etc. Driver genes provided in the user-provided gene of interest list are framed in green boxes (ARID1B and MSH6 in this example). Further details on each of the features depicted below can be found at [pvactools.org](https://pvactools.org) and within the pVACview interface itself (Tutorials and Documentation sections).

|    | Gene   | AA Change | Best Peptide | TSL | Allele      | Pos | Prob Pos | Num Passing Peptides | IC50 MT | IC50 WT   | %ile MT | %ile WT | RNA Expr | RNA VAF | Allele Expr | RNA Depth | DNA VAF | Tier | Ref Match | Acpt | Rej | Rev |
|----|--------|-----------|--------------|-----|-------------|-----|----------|----------------------|---------|-----------|---------|---------|----------|---------|-------------|-----------|---------|------|-----------|------|-----|-----|
| 1  | ADAR   | E806V     | AERMNGFTVV   | 1   | HLA-B*45:01 | 8   | None     | 5                    | 76.11   | 61.796    | 0.1     | 0.125   | 131.835  | 0.348   | 45.879      | 1233      | 0.302   | Pass | False     |      |     |     |
| 2  | KIF1C  | S433F     | TEFQIGPEEA   | 1   | HLA-B*45:01 | 3   | None     | 1                    | 152.1   | 166.310   | 0.35    | 0.473   | 121.453  | 0.297   | 36.072      | 1679      | 0.316   | Pass | False     |      |     |     |
| 3  | OSTC   | F9L       | YRVPLVL      | 1   | HLA-C*06:02 | 5   | None     | 1                    | 282.169 | 272.915   | 0.232   | 0.202   | 173.877  | 0.486   | 84.504      | 1028      | 0.462   | Pass | False     |      |     |     |
| 4  | SURF1  | N89K      | RRKWKCLKLI   | 1   | HLA-C*06:02 | 7   | None     | 2                    | 212.835 | 161.921   | 0.451   | 0.332   | 46.709   | 0.762   | 35.592      | 563       | 0.700   | Pass | False     |      |     |     |
| 5  | ARID1B | G910A     | SPGGQMHA     | 1   | HLA-B*82:02 | 9   | None     | 1                    | 345.587 | 2240.610  | 0.61    | 2.500   | 39.757   | 1.000   | 39.757      | 163       | 1.000   | Pass | False     |      |     |     |
| 6  | HSPA4  | L751P     | NPQNQKSL     | 1   | HLA-B*82:02 | 2   | None     | 1                    | 454.22  | 19898.660 | 0.49    | 14.000  | 114.662  | 0.996   | 114.203     | 1368      | 1.000   | Pass | False     |      |     |     |
| 7  | MSH6   | D1255N    | VENYSQNV     | 1   | HLA-B*45:01 | 3   | None     | 4                    | 66.515  | 332.805   | 0.254   | 0.665   | 48.832   | 0.338   | 16.505      | 352       | 0.318   | Pass | False     |      |     |     |
| 8  | RPRD1A | Q21H      | SELSNSQHSV   | 1   | HLA-B*45:01 | 8   | None     | 1                    | 368.845 | 354.640   | 0.43    | 0.415   | 57.249   | 0.500   | 28.625      | 602       | 0.417   | Pass | False     |      |     |     |
| 9  | MAU2   | S111R     | VKFEARLL     | 1   | HLA-C*06:02 | 7   | None     | 2                    | 212.075 | 484.278   | 0.424   | 1.251   | 34.844   | 0.437   | 15.227      | 238       | 0.345   | Pass | False     |      |     |     |
| 10 | ASMTL  | T445M     | AMAFNLSRF    | 1   | HLA-A*29:02 | 2   | None     | 1                    | 618.761 | 2037.415  | 1.579   | 2.250   | 74.609   | 0.460   | 34.320      | 804       | 0.467   | Pass | False     |      |     |     |

**Fig. S3. Visualize and explore - Evaluate individual variant details: DNA/RNA VAF, gene expression and genomic variant coordinates**

Once a specific variant row is selected in the aggregate report table, users are provided with a 'Variant and Gene info' box, which provides further information on the precise genomic location and nucleic acid change, as well as a link to an OpenCRAVAT variant report for the respective variant. The 'Variant and Gene info' box is located in the 'Variant Information' tab.

Variant & Gene Info

DNA VAF

0.302

RNA VAF

0.348

Gene Expression

131.835

Genomic Information (chromosome - start - stop - ref - alt)

chr1-154590262-154590263-T-A

Additional variant information:

[OpenCRAVAT variant report](#)

**Fig. S4. Visualize and explore - Evaluate and compare alternative transcripts: transcript expression, transcript support level, biotype and transcript length**

A) Multiple transcripts that give rise to the exact same list of peptide candidates are grouped into a single transcript set. B) Once a transcript set is selected, users are provided with information on each individual transcript containing the variant. Transcript specific expression estimates, transcript support level (TSL) and biotype can be used to identify a suitable reference transcript sequence for extraction of long peptide sequences that contain a neoantigen. When multiple transcript options are available within a transcript set, the “top” transcript (highlighted in green) is selected using the TSL, biotype and transcript length information.

**A. Transcript set selection**

Variant Information

Transcript Sets of Selected Variant

Reference Matches

Additional Data

Show 10 entries

Search:

|   | Transcript Sets  | #Transcripts | # Peptides | Total Expr        |
|---|------------------|--------------|------------|-------------------|
| 1 | Transcript Set 1 | 14           | 3          | 85.00399999999999 |
| 2 | Transcript Set 2 | 1            | 3          | 7.565             |

**B. Transcripts in selected set**

Transcript and Peptide Set Data

Peptide Candidates from Selected Transcript Set

Anchor Heatmap

Transcripts in Set

Show 10 entries

Search:

|    | Transcripts in Selected Set    | Expression | Transcript Support Level | Biotype        | Transcript Length (#AA) |
|----|--------------------------------|------------|--------------------------|----------------|-------------------------|
| 1  | ENST00000368474.9-ADAR-E/V-806 | 29.266     | 1                        | protein_coding | 1226                    |
| 2  | ENST00000368471.8-ADAR-E/V-511 | 36.828     | 1                        | protein_coding | 931                     |
| 3  | ENST00000680305.1-ADAR-E/V-806 | 0.938      | N/A                      | protein_coding | 1165                    |
| 4  | ENST00000648231.2-ADAR-E/V-511 | 0.517      | N/A                      | protein_coding | 931                     |
| 5  | ENST00000648311.1-ADAR-E/V-511 | 0.922      | N/A                      | protein_coding | 931                     |
| 6  | ENST00000649022.2-ADAR-E/V-511 | 1.143      | N/A                      | protein_coding | 931                     |
| 7  | ENST00000649042.1-ADAR-E/V-511 | 10.425     | N/A                      | protein_coding | 931                     |
| 8  | ENST00000649724.1-ADAR-E/V-511 | 4.006      | N/A                      | protein_coding | 931                     |
| 9  | ENST00000649749.1-ADAR-E/V-511 | 0          | N/A                      | protein_coding | 931                     |
| 10 | ENST00000680270.1-ADAR-E/V-511 | 0          | N/A                      | protein_coding | 931                     |

Showing 1 to 10 of 14 entries

Previous

1

2

Next

**Fig. S5. Visualize and explore - Evaluate and compare peptides arising from a single variant and transcript set**

The “Peptide Candidates from Selected Transcript Set” table provides details for peptides arising from the selected transcript set (i.e. for cases where multiple alternative transcripts give rise to the exact same list of peptide candidates). For each peptide, the predicted per MHC allele IC50 binding affinity, mutation position, problematic positions and anchor residue fail status is provided. Each row corresponds to either the mutant peptide or the corresponding wild type peptide sequence, indicated as “MT” and “WT” respectively. Users are able to select MT/WT peptides for further information. The “top” peptide (highlighted in green) is identified by eliminating any problematic peptides and choosing from the remaining peptides the one with the strongest binding score.

Transcript and Peptide Set Data

Peptide Candidates from Selected Transcript Set

Anchor Heatmap

Transcripts in Set

Show 10 entries

Search:

|   | Peptide Sequence | Type | HLA-A*29:02 | HLA-B*45:01 | HLA-B*82:02 | HLA-C*06:02 | Mutation Position | Problematic Positions | Anchor Residue Fail |
|---|------------------|------|-------------|-------------|-------------|-------------|-------------------|-----------------------|---------------------|
| 1 | AERMGFTVV        | MT   | X           | 76.11       | X           | X           | 8                 | None                  | None                |
| 2 | AERMGFTEV        | WT   | X           | 61.8        | X           | X           | 8                 |                       |                     |
| 3 | AERMGFTVVT       | MT   | X           | 214.66      | X           | X           | 8                 | None                  | None                |
| 4 | AERMGFTEVT       | WT   | X           | 219.26      | X           | X           | 8                 |                       |                     |
| 5 | AERMGFTV         | MT   | X           | 370         | X           | X           | 8                 | None                  | None                |
| 6 | AERMGFTE         | WT   | X           | 3973.04     | X           | X           | 8                 |                       |                     |

### Fig. S6. Visualize and explore - Evaluate an individual peptide: IC50 binding affinity violin plot

After selecting a single mutant peptide, the IC50 Plot tab shows violin plots of IC50 binding affinity predictions from individual algorithms for the MT (mutant) and matched WT (wildtype) peptides for each HLA allele meeting a binding affinity threshold.

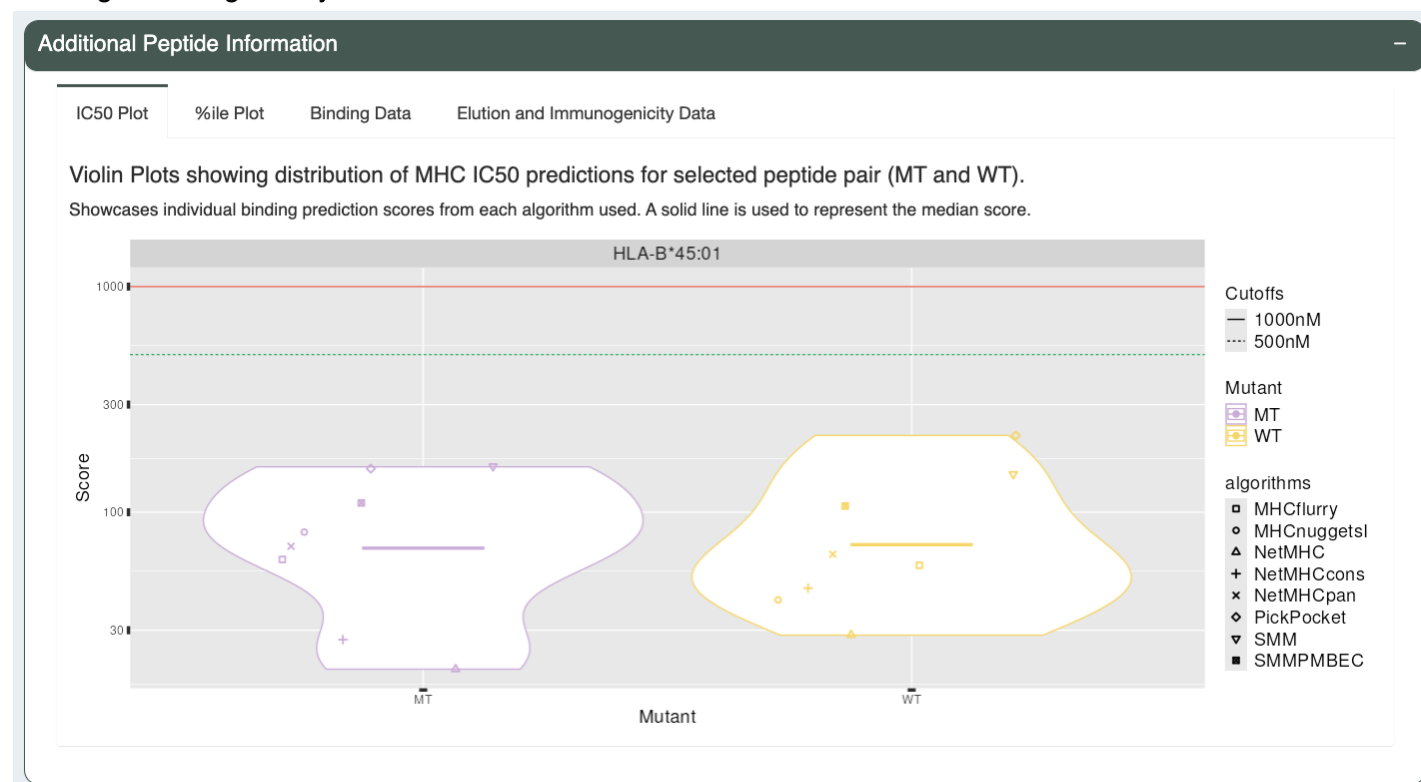

### Fig. S7. Visualize and explore - Evaluate an individual peptide: percentile rank (%ile) violin plot

For a selected mutant peptide the %ile plot shows violin plots of the individual algorithm percentile ranks of the MT (mutant) and matched WT (wildtype) peptides for each MHC allele meeting a binding affinity threshold.

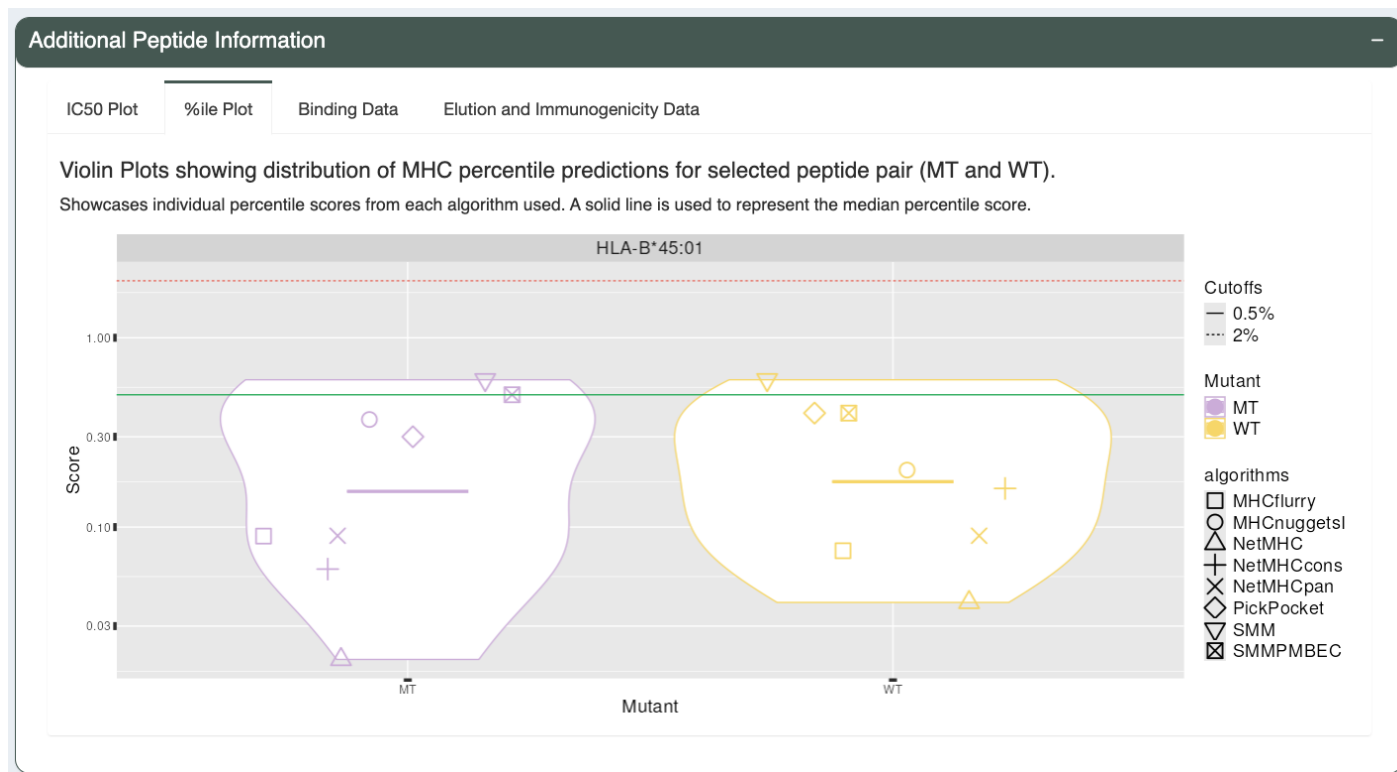

**Fig. S8. Visualize and explore - Evaluate an individual peptide: IC50 binding affinity and percentile rank**  
The Binding Data table shows the numerical IC50 binding affinity and percentile rank values for a selected pair of mutant and wild type peptides across prediction algorithms.

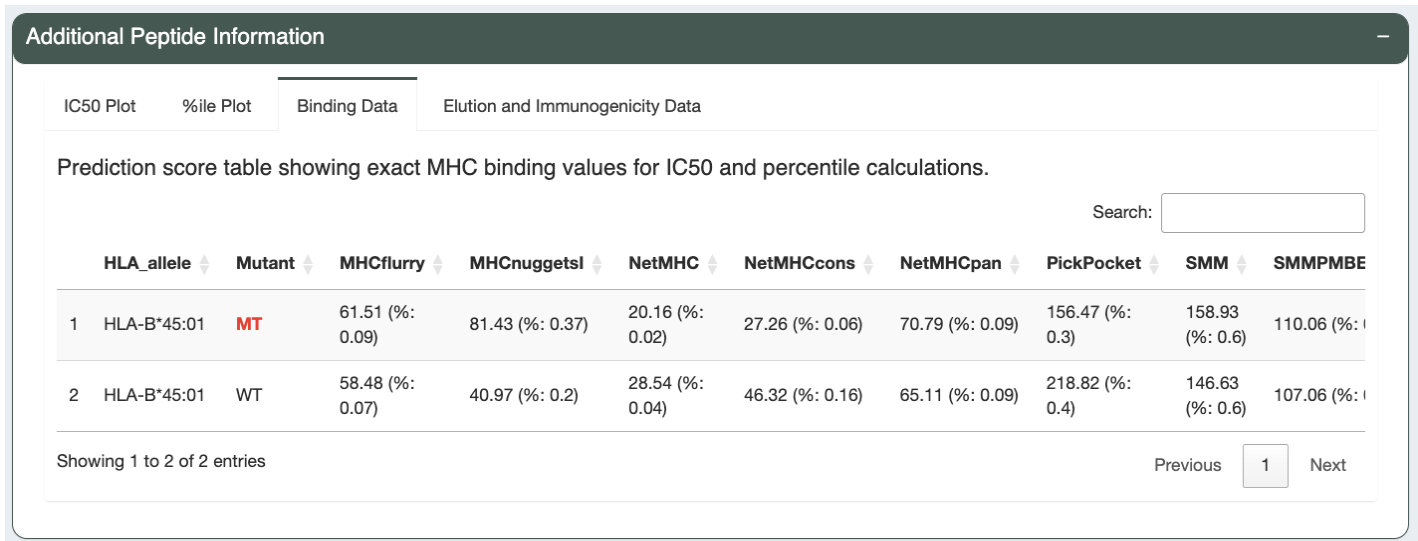

**Fig. S9. Visualize and explore - Evaluate an individual peptide: elution and immunogenicity**  
The Elution and Immunogenicity Data Table lists scores and percentile ranks from predictors trained on peptide elution mass spectrometry data (e.g. BigMHC\_EL, MHCflurryEL, NetMHCPanEL) and immunogenicity data (e.g. BigMHC\_IM, DeepImmuno).

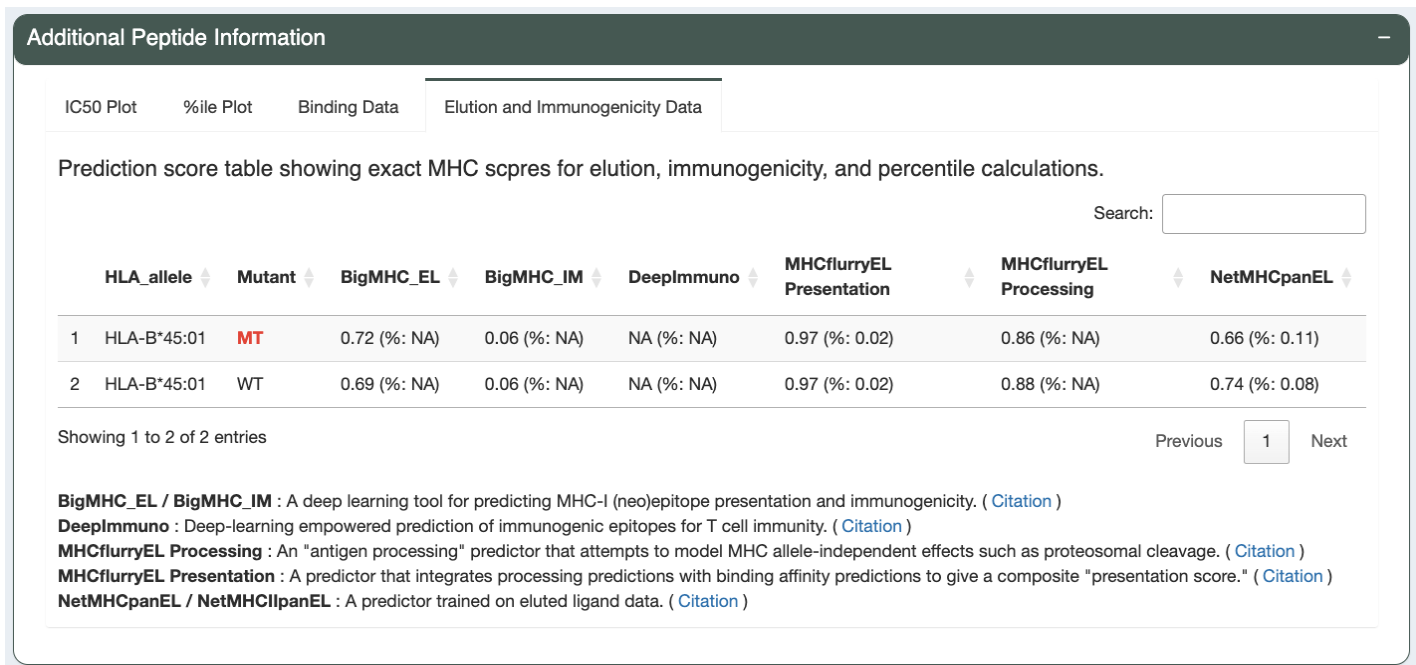

**Fig. S10. Visualize and explore - Evaluate an individual peptide: anchor residue (heatmap)**

For each peptide, we also provide users with an allele-specific anchor prediction heatmap. These predictions are normalized probabilities representing the likelihood of each position of the peptide to participate in anchoring to the MHC molecule. The top 15 MT/WT peptide pairs from the peptide table are shown with anchor probabilities overlaid as a heatmap (darker blue indicating higher probability of the position acting as an anchor). The anchor probabilities shown are both allele and peptide length specific. In the anchor heatmap view, the mutated amino acids are marked in red and MT/WT pairs are separated using a dotted line.

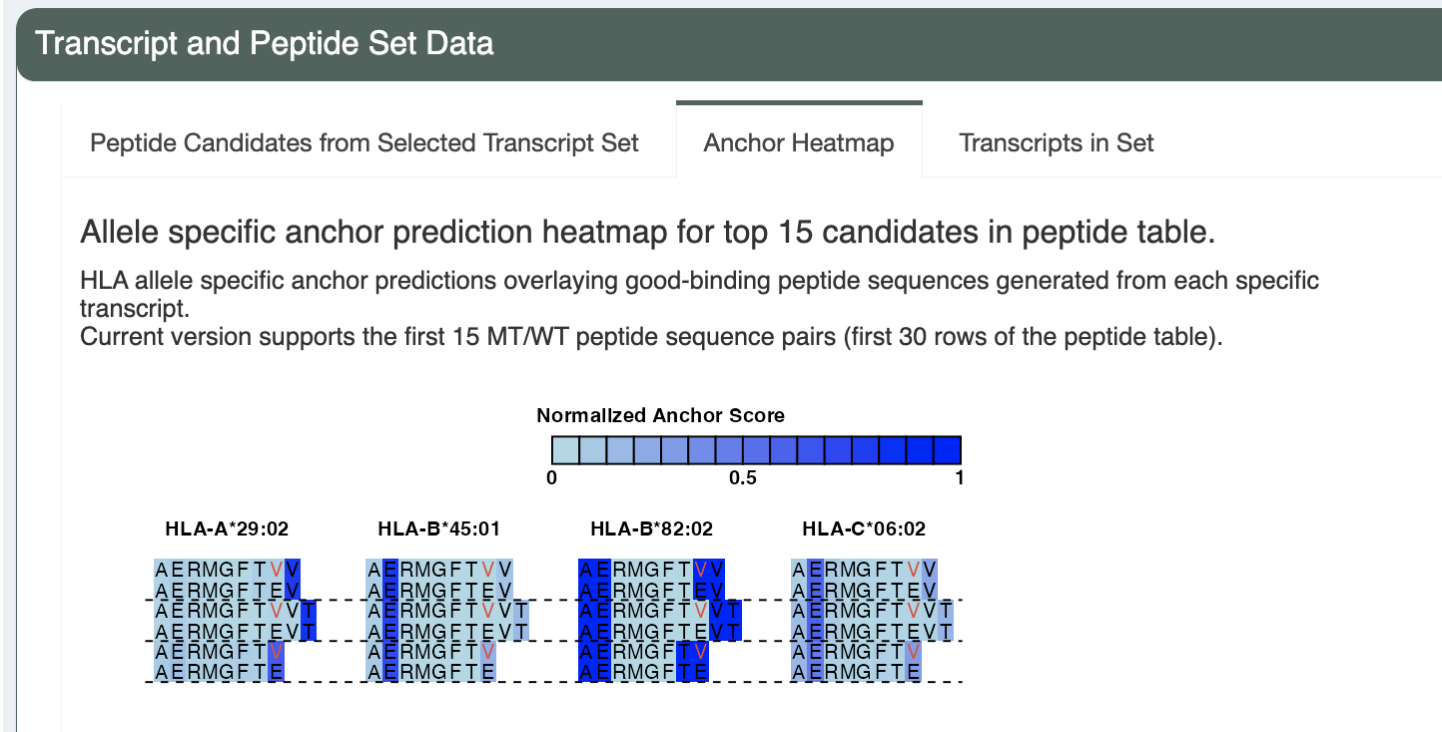

The list of likely anchor positions and the underlying per-position anchor probabilities can be found in tables at the bottom of the 'Anchor Heatmap' tab. Empty entries in the 'Anchor Weights' table denote that there is no data available for this allele-length combination.

Anchor Weights

Search:

|    | HLA Allele  | Peptide Length | 1           | 2          | 3           | 4           | 5           | 6           | 7           | 8           | 9           | 10          | 11         |
|----|-------------|----------------|-------------|------------|-------------|-------------|-------------|-------------|-------------|-------------|-------------|-------------|------------|
| 1  | HLA-A*29:02 | 8mer           | 0.068141265 | 0.11413080 | 0.045241486 | 0.033563310 | 0.031645104 | 0.058932922 | 0.046453343 | 0.60189177  |             |             |            |
| 2  | HLA-A*29:02 | 9mer           | 0.027173719 | 0.05973064 | 0.027878104 | 0.007256377 | 0.007553450 | 0.007749724 | 0.041285151 | 0.031141772 | 0.79023106  |             |            |
| 3  | HLA-A*29:02 | 10mer          | 0.018743290 | 0.06022124 | 0.024717122 | 0.007868624 | 0.009926700 | 0.008592144 | 0.008564768 | 0.011940418 | 0.015568683 | 0.83385701  |            |
| 4  | HLA-A*29:02 | 11mer          | 0.017371246 | 0.04931307 | 0.016605171 | 0.006899248 | 0.011749747 | 0.008182757 | 0.018084063 | 0.008777135 | 0.014420077 | 0.020995273 | 0.82760221 |
| 5  | HLA-B*45:01 | 8mer           | 0.063369216 | 0.69451558 | 0.018411695 | 0.005718064 | 0.009289562 | 0.007436781 | 0.009392275 | 0.19186683  |             |             |            |
| 6  | HLA-B*45:01 | 9mer           | 0.042517027 | 0.81338246 | 0.013212502 | 0.003560292 | 0.005820929 | 0.008049169 | 0.006774270 | 0.007645567 | 0.09903779  |             |            |
| 7  | HLA-B*45:01 | 10mer          | 0.040791470 | 0.74175530 | 0.023230564 | 0.006504404 | 0.007973135 | 0.008352411 | 0.007384598 | 0.009207378 | 0.008486203 | 0.14631454  |            |
| 8  | HLA-B*45:01 | 11mer          | 0.041115710 | 0.74974750 | 0.011650547 | 0.005554250 | 0.004031492 | 0.007538834 | 0.008083128 | 0.009255211 | 0.009941918 | 0.016693019 | 0.13638839 |
| 9  | HLA-B*82:02 | 8mer           |             |            |             |             |             |             |             |             |             |             |            |
| 10 | HLA-B*82:02 | 9mer           |             |            |             |             |             |             |             |             |             |             |            |

Showing 1 to 10 of 16 entries

Previous

1

2

Next

### Fig. S12. Visualize and explore - Evaluate individual peptide: anchor scenarios

Given the anchor position prediction, users can consult the anchor scenario view (in the 'Anchor Heatmap' tab) to prioritize (Accept) neoantigen candidates. To be specific:

**Scenario 1** shows the case where the WT is a poor binder and the MT peptide is a strong binder, containing a mutation at an anchor location. Here, the mutation results in a tighter binding of the MHC and allows for better presentation and potential for recognition by the TCR. As the WT does not bind (or is a poor binder), this neoantigen remains a good candidate since the sequence presented to the TCR is novel. **Scenario 2** and **Scenario 3** both have strong binding WT and MT peptides. In **Scenario 2**, the mutation of the peptide is located at a non-anchor location, creating a difference in the sequence participating in TCR recognition compared to the WT sequence. In this case, although the WT is a strong binder, the neoantigen remains a good candidate that should not be subject to central tolerance. However, as shown in **Scenario 3**, there are neoantigen candidates where the mutation is located at the anchor position and both peptides are strong binders. Although anchor positions can themselves influence TCR recognition, a mutation at a strong anchor location generally implies that both WT and MT peptides may present the same residues for TCR recognition. As the WT peptide is a strong binder, the MT neoantigen, while also a strong binder, will likely be subject to central tolerance and should not be considered for prioritization. **Scenario 4** shows the case where the WT is a poor binder and the MT peptide is a strong binder. In this case, the mutation is located at a non-anchor position, likely resulting in a different set of residues presented to the TCR and thus making the neoantigen a good candidate.

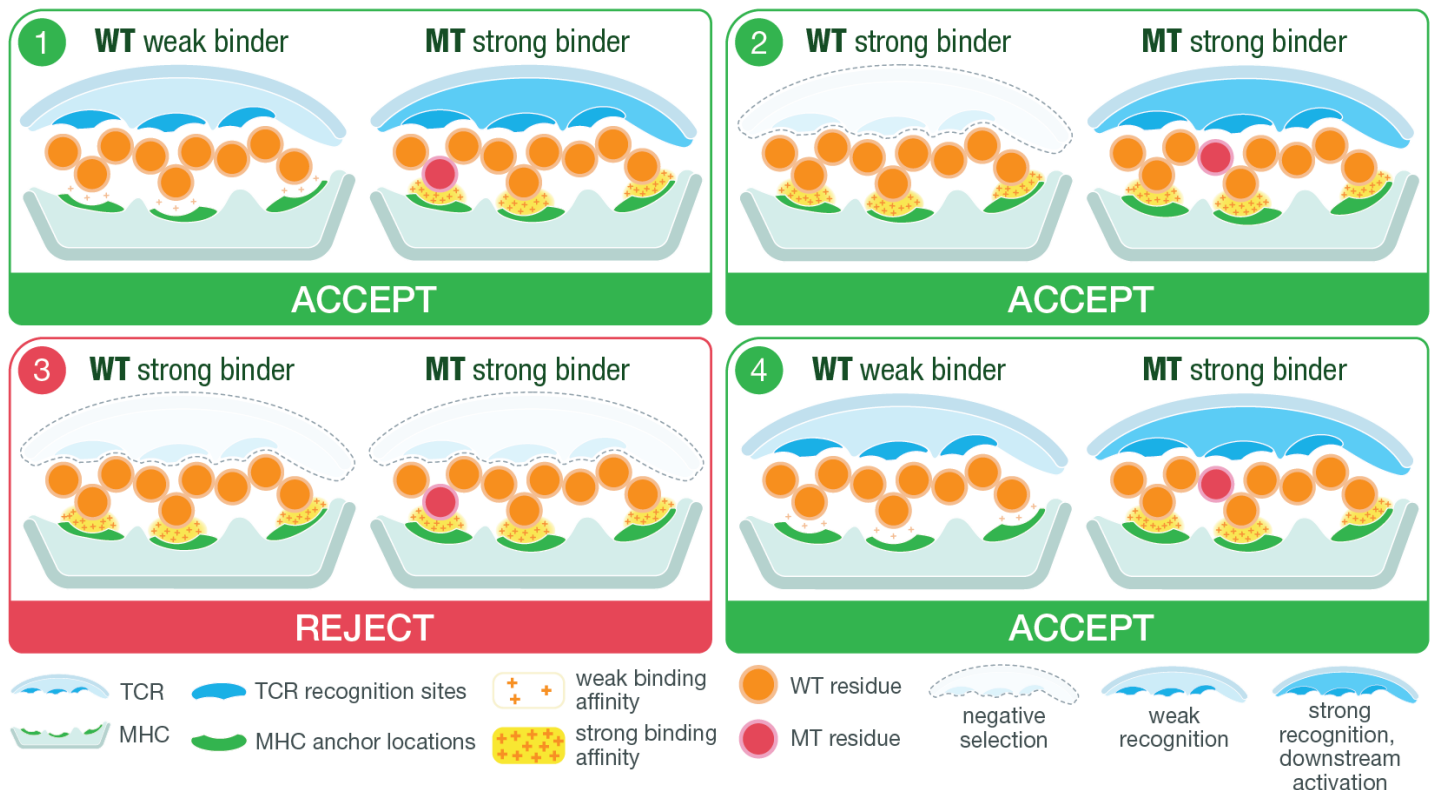

**Fig. S13. Visualize and explore - Evaluate problematic features: reference proteome similarity**

To ensure that the candidate is a non-self peptide, users can also check if the sequence of the best peptide candidate for a variant matches any sequence found in the reference proteome. This view shows the best peptide with the mutated position(s) highlighted in red as well as the reviewed variant information. The Query Sequence corresponds to a longer sequence around the mutation that is used to search for reference matches. The best peptide is highlighted in yellow in the query sequence. Any 8-mer or longer sub-sequence of the query sequence found in the reference proteome is considered a match and displayed in the table below, along with its gene, transcript, and protein information.

Variant Information

Transcript Sets of Selected Variant

Reference Matches

Additional Data

Best Peptide Data

Best Peptide:

KIITIGEKIPY

AA Change:

H389Y

Pos:

3

Gene:

ZNF141

Query Data

Query Sequence:

LNIEHKKIITIGEKIPYK

Hits:

10

Hits

Show  entries

Search:

|   | Matched Peptide | Genes            | Transcripts                                                                                                                                                                   | Hit IDs                                 |
|---|-----------------|------------------|-------------------------------------------------------------------------------------------------------------------------------------------------------------------------------|-----------------------------------------|
| 1 | KKIYTGEKPYK     | ZNF721           | ENST00000338977.5,<br>ENST00000511833.3                                                                                                                                       | ENSP000000428878.1,ENSP00000340524.5    |
| 2 | IYTGKPYK        | ZNF480,<br>ZNF92 | ENST00000328747.12,<br>ENST00000334564.11,<br>ENST00000335090.6,<br>ENST00000357512.3,<br>ENST00000431504.1,<br>ENST00000450302.2,<br>ENST00000468240.6,<br>ENST00000595962.6 | ENSP000000471754.1,ENSP00000417424.1,EN |

Showing 1 to 2 of 2 entries

Previous

1

Next

**Fig. S14. Visualize and explore - Evaluate problematic features: problematic amino acids**

A) If the user specified potential problematic amino acids when running pVACseq, candidates with these problematic amino acids will be flagged by a red box in the “Prob Pos” (Problematic Positions) column in the main aggregate report table. For example, here the user specified Cysteine (C) as a problematic amino acid for manufacturing, and as a result, the neoantigen candidate SRNCEIWQV (with a Cysteine at position 4) is flagged by pVACview. B) This information is also displayed in the Peptide Candidates from Selected Transcript Set table mentioned earlier.

**A. Problematic positions highlighted in the aggregate report table**

Aggregate Report of Best Candidates by Variant

Number of variants displayed per page:

10

Column visibility

Search:

|    | Gene   | AA Change    | Best Peptide | TSL | Allele      | Pos | Prob Pos | Num Passing Peptides | IC50 MT | IC50 WT  | %ile MT | %ile WT | RNA Expr | RNA VAF | Allele Expr | RNA Depth | DNA VAF | Tier      | Ref Match |
|----|--------|--------------|--------------|-----|-------------|-----|----------|----------------------|---------|----------|---------|---------|----------|---------|-------------|-----------|---------|-----------|-----------|
| 31 | PLAAT4 | FS113-120    | SRNCEIWQV    | 1   | HLA-C*06:02 | 6-9 | 4        | 1                    | 153.975 | 5546.497 | 0.36    | 5.750   | 43.703   | 0.115   | 5.026       | 426       | 0.071   | Subclonal | False     |
| 32 | PARP12 | VIFE662-665E | SIFEKHQVY    | 1   | HLA-A*29:02 | 3-4 | None     | 1                    | 126.8   | 144.030  | 0.265   | 0.295   | 29.767   | 0.153   | 4.554       | 307       | 0.108   | Subclonal | False     |
| 33 | DLGAP5 | S202L        | MPTLLRMTRSA  | 1   | HLA-B*82:02 | 4   | None     | 1                    | 466.68  | 434.980  | 0.73    | 0.670   | 53.642   | 0.224   | 12.016      | 825       | 0.240   | Subclonal | False     |

**B. Problematic positions highlighted in the peptide candidates table for a selected variant**

Transcript and Peptide Set Data

Peptide Candidates from Selected Transcript Set

Anchor Heatmap

Transcripts in Set

Show 10 entries

Search:

| Peptide Sequence | Type | HLA-A*29:02 | HLA-B*45:01 | HLA-B*82:02 | HLA-C*06:02 | Mutation Position | Problematic Positions | Anchor Residue Fail |
|------------------|------|-------------|-------------|-------------|-------------|-------------------|-----------------------|---------------------|
| 1 SRNCEIWQV      | MT   | X           | X           | X           | 153.98      | 6-9               | 4                     | None                |
| 2 SRNCEHFVT      | WT   | X           | X           | X           | 5546.5      | 6-9               |                       |                     |

Showing 1 to 2 of 2 entries

Previous 1 Next

Fig. S15. Visualize and explore - Capture evaluation status

A) After reviewing each neoantigen candidate, users can leave their evaluation by clicking the appropriate button on the right of each row: thumbs-up for accept, thumbs-down for reject, or flag for candidates requiring further review. For example, a candidate with a reference proteome match might be rejected while a candidate with poor percentile rank might require further review, depending on the user’s selection criteria . B) The total number of candidates for each evaluation status are captured in the Peptide Evaluation Overview panel under the ‘Variant Information’ section.

A. Aggregate Report of Best Candidates by Variant with evaluations selected

Aggregate Report of Best Candidates by Variant

Column visibility

Search:

|    | Gene    | AA Change | Best Peptide | TSL | Allele      | Pos | Prob Pos | Num Passing Peptides | IC50 MT | IC50 WT   | %ile MT | %ile WT | RNA Expr | RNA VAF | Allele Expr | RNA Depth | DNA VAF | Tier | Ref Match | Acpt | Rej | Rev |
|----|---------|-----------|--------------|-----|-------------|-----|----------|----------------------|---------|-----------|---------|---------|----------|---------|-------------|-----------|---------|------|-----------|------|-----|-----|
| 11 | SIX4    | E23Q      | QENGMQSA     | 1   | HLA-B*45:01 | 6   | None     | 2                    | 222.02  | 324.685   | 0.23    | 0.405   | 15.017   | 0.987   | 14.822      | 76        | 1.000   | Pass | False     |      |     |     |
| 12 | ZNF548  | D12Y      | VVFEYVAIY    | 1   | HLA-A*29:02 | 5   | None     | 5                    | 41.063  | 75.490    | 0.115   | 0.260   | 13.433   | 0.378   | 5.078       | 127       | 0.468   | Pass | False     |      |     |     |
| 13 | MYBBP1A | E653G     | VEVLVGILLA   | 1   | HLA-B*45:01 | 6   | None     | 1                    | 331.25  | 403.175   | 0.73    | 1.030   | 47.493   | 0.319   | 15.150      | 420       | 0.352   | Pass | False     |      |     |     |
| 14 | UQCC1   | W44S      | SRTSQSPQM    | 1   | HLA-C*06:02 | 6   | None     | 1                    | 365.305 | 752.965   | 0.594   | 1.064   | 47.722   | 0.327   | 15.605      | 581       | 0.434   | Pass | False     |      |     |     |
| 15 | SORBS3  | R336P     | APSLSPHKM    | 1   | HLA-B*82:02 | 2   | None     | 2                    | 250.848 | 23477.210 | 0.37    | 22.000  | 23.107   | 0.374   | 8.642       | 195       | 0.464   | Pass | True      |      |     |     |
| 16 | ADPRHL1 | H220N     | QENWFYFEA    | 1   | HLA-B*45:01 | 3   | None     | 4                    | 11.08   | 11.610    | 0.027   | 0.033   | 2.743    | 0.917   | 2.515       | 24        | 0.517   | Pass | False     |      |     |     |
| 17 | SETD6   | R185H     | DLANIHSEY    | 1   | HLA-A*29:02 | 6   | None     | 1                    | 103.73  | 277.900   | 0.483   | 0.940   | 11.622   | 0.340   | 3.951       | 100       | 0.335   | Pass | False     |      |     |     |
| 18 | ATP7A   | D870H     | HESLITGEA    | 1   | HLA-B*45:01 | 1   | None     | 1                    | 164.31  | 360.225   | 0.4     | 0.750   | 5.153    | 0.951   | 4.901       | 41        | 0.982   | Pass | False     |      |     |     |
| 19 | ZBTB3   | S405F     | EPLYLSFEY    | 1   | HLA-A*29:02 | 7   | None     | 1                    | 382.42  | 2333.530  | 1.167   | 2.800   | 13.703   | 0.601   | 8.236       | 148       | 0.670   | Pass | False     |      |     |     |
| 20 | ZNF25   | E21K      | KEKWKLLTPA   | 1   | HLA-B*45:01 | 3   | None     | 1                    | 377.255 | 137.860   | 0.64    | 0.470   | 13.090   | 0.471   | 6.165       | 187       | 0.485   | Pass | False     |      |     |     |

Showing 11 to 20 of 321 entries

Show 10 entries

Currently investigating row: 20

Previous

1

2

3

4

5

...

33

Next

B. Peptide Evaluation Overview table

Peptide Evaluation Overview

| Evaluation | Count |
|------------|-------|
| Accept     | 8     |
| Pending    | 311   |
| Reject     | 1     |
| Review     | 1     |

Fig. S16. Visualize and explore - Rescuing poor candidate

In the case that users upload Class I predictions (tsv) as the required input and Class II predictions (tsv) as the additional input, candidates with class I peptides that don't meet a user's selection criteria might be rescued by evaluating the class II peptides, which can be viewed in the Additional Data tab. For example, this TXNDC15 variant (A) has class I peptides with poor IC50 binding affinity, resulting in a Poor tier. However, other selection criteria like the RNA VAF, allele expression, etc. are within range. Moreover, the Additional Data for this variant (B) indicates good class II IC50 binding affinity and percentile rank, therefore, users may consider rescuing this candidate. After leaving a comment (C) on the variant to capture this observation, the candidate is flagged as requiring further review as indicated by the flag button (A).

A. Candidate with poor class I binding affinity and percentile rank

Aggregate Report of Best Candidates by Variant

Column visibility

Search: TXNDC15

| Gene | AA Change | Best Peptide | TSL         | Allele | Pos         | Prob Pos | Num Passing Peptides | IC50 MT | IC50 WT | %ile MT   | %ile WT | RNA Expr | RNA VAF | Allele Expr | RNA Depth | DNA VAF | Tier  | Ref Match | Acpt  | Rej | Rev |  |
|------|-----------|--------------|-------------|--------|-------------|----------|----------------------|---------|---------|-----------|---------|----------|---------|-------------|-----------|---------|-------|-----------|-------|-----|-----|--|
| 48   | TXNDC15   | S248P        | APQHSSLSTRF | 1      | HLA-B*82:02 | 2        | None                 | 0       | 1145.59 | 24218.040 | 1       | 23.590   | 42.950  | 0.996       | 42.778    | 447     | 0.993 | Poor      | False |     |     |  |

Showing 1 to 1 of 1 entries (filtered from 321 total entries)

Show 10 entries

Previous 1 Next

Currently investigating row:

48

B. Additional class II data for this variant

Variant Information

Transcript Sets of Selected Variant

Reference Matches

Additional Data

Additional Data Type:

Median MT IC50:

24.095

Median MT Percentile:

0.390

Best Peptide:

ALHFLALDAPQHSSL

Corresponding HLA allele:

DRB1\*04:05

Best Transcript:

ENST00000358387.9

C) Comment interface to capture additional observations for this variant

Add Comments for selected variant

Please add/update your comments for the variant you are currently examining

Update Comment Section

Comment:

Good class II binder.

Fig. S17. Export evaluated neoantigens

When users have either finished ranking neoantigen candidates or need to pause and would like to save current evaluations, they can export the current main aggregate report using the export page. We provide two download file types (tsv and excel). The output files include the ‘Evaluation’ and ‘Comment’ columns, which capture the evaluations (Accept/Reject/Review/Pending) and comments recorded during the review process.

pVACview

pVACtools Output

Upload

Visualize and Explore

Export

Neofox Data Visualization

Custom Data Visualization

Tutorials

pVACview Documentation

Submit Github Issue

Export filename:

Annotated.Neoantigen\_Candidates

Download as TSV   Download as excel

| ID                           | A*29:02 | B*45:01 | B*82:02 | C*06:02 | Gene  | AA Change | Num Passing Transcripts | Best Peptide | Best Transcript    | TSL |
|------------------------------|---------|---------|---------|---------|-------|-----------|-------------------------|--------------|--------------------|-----|
| chr1-154590262-154590263-T-A |         | 5       |         |         | ADAR  | E806V     | 15                      | AERMGFTV     | ENST00000368474.9  | 1   |
| chr17-5007046-5007047-C-T    |         | 1       |         |         | KIF1C | S433F     | 1                       | TEFQIGPEEA   | ENST00000320785.10 | 1   |
| chr4-108650681-108650682-C-G |         |         |         | 1       | OSTC  | F9L       | 3                       | YRVPLLVL     | ENST00000361564.9  | 1   |
| chr9-133354714-133354715-G-C |         |         |         | 2       | SURF1 | N89K      | 1                       | RRKWKLKLI    | ENST00000371974.8  | 1   |
